# Supplementary material for: Significant average ZT enhancement in Cu3SbSe4-based thermoelectric material via softening p–d hybridization
Source: Royal Society of Chemistry journal article supplement (doi:10.1039/c9ta05115e), 2019-01-01
Supplement: c9ta05115e1.pdf [file c9ta05115e1.pdf]

This ESI for *J. Mater. Chem. A*, 2019, DOI: 10.1039/C9TA05115E, originally published on 20<sup>th</sup> June 2019, was updated on 10<sup>th</sup> July 2019 to fix an error in the legend of Fig. S3 ('Cu 4d' was corrected to 'Cu 3d').

Electronic Supporting information for

**Significant average *ZT* enhancement in Cu<sub>3</sub>SbSe<sub>4</sub>-based thermoelectric material via softening *p-d* hybridization**

Dan Zhang,<sup>a, b</sup> Junyou Yang<sup>b\*</sup>, Hongchang Bai<sup>a</sup>, Yubo Luo<sup>c</sup>, Bin Wang<sup>a</sup>, Shuaihang Hou<sup>a</sup>, Zhiliang Li<sup>a\*</sup> and Shufang Wang<sup>a\*</sup>

<sup>a</sup> Hebei Key Lab of Optic-Electronic Information and Materials, The College of Physics Science and Technology, Hebei University, Baoding 071002, China

<sup>b</sup> State Key Laboratory of Material Processing and Die & Mould Technology, Huazhong University of Science & Technology, Wuhan 430074, P.R. China

<sup>c</sup> School of materials science and engineering, Nanyang Technological University, 50 Nanyang Avenue, 639798, Singapore

**1) Effective mass and Lorenz number calculation based on SPB model**

The effective mass ( $m^*$ ) and Lorenz number ( $L$ ) are calculated according to the following equations<sup>[1-2]</sup>:

$$S = \pm \frac{\kappa_B}{e} \left( \frac{(r+5/2)F_{r+3/2}(\eta)}{(r+3/2)F_{r+1/2}(\eta)} - \eta \right) \quad (1)$$

$$F_n(\eta) = \int_0^\infty \frac{x^n}{1+e^{x-\eta}} dx \quad (2)$$

$$m^* = \frac{h^2}{2\kappa_B T} \left[ \frac{n}{4\pi F_{1/2}(\eta)} \right]^{2/3} \quad (3)$$

$$L = \left( \frac{\kappa_B}{e} \right)^2 \left\{ \frac{(r+7/2)F_{r+5/2}(\eta)}{(r+3/2)F_{r+1/2}(\eta)} - \left[ \frac{(r+5/2)F_{r+3/2}(\eta)}{(r+3/2)F_{r+1/2}(\eta)} \right]^2 \right\} \quad (4)$$

Where  $\eta$  is the reduced Fermi energy,  $F_n(\eta)$  is the  $n^{\text{th}}$  order Fermi integral,  $\kappa_B$  is the Boltzmann constant,  $e$  is the electron charge,  $h$  is the Planck constant and  $r$  is the scattering factor. The scattering factor ( $r$ ) is -1/2 as the acoustic phonon scattering is

independent of the grain size and is generally assumed to be the main scattering mechanism at room temperature.

## 2) Callaway model calculation

The Debye-Callaway model is used to describe the influence of point defects on the lattice thermal conductivity. Following equations <sup>[3-5]</sup> are used for the modeling of the composition-dependent lattice thermal conductivity:

$$\frac{\kappa_L^{cal}}{\kappa_L^{pure}} = \frac{\tan^{-1}(U)}{U} \quad (5)$$

$$U = \left( \frac{\pi^2 \theta_D \Omega}{h v^2} \kappa_L^{pure} \Gamma \right)^{\frac{1}{2}} \quad (6)$$

$$\Gamma = \Gamma_m + \Gamma_s = x(1-x) \left[ \left( \frac{\Delta M}{M} \right)^2 + \varepsilon \left( \frac{\Delta r}{r} \right)^2 \right] \quad (7)$$

Where  $\kappa_L^{pure}$  is the lattice thermal conductivity of the parent sample,  $\kappa_L^{cal}$  is the calculated lattice thermal conductivity,  $\theta_D$  is the Debye temperature calculated from the sound velocity measurement,  $h$  is the Planck constant,  $\Omega$  is the average volume per atom,  $v$  is the average sound velocity,  $\Gamma$  is the total disorder parameter which includes the mass fluctuation part ( $\Gamma_m$ ) and strain field fluctuation part ( $\Gamma_s$ ),  $M$  is the average atomic mass,  $\Delta M$  is the mass difference,  $r$  is the average atomic radius,  $\Delta r$  is the atomic radius difference,  $\varepsilon$  is the lattice anharmonic parameter estimated by the method from refs [6].

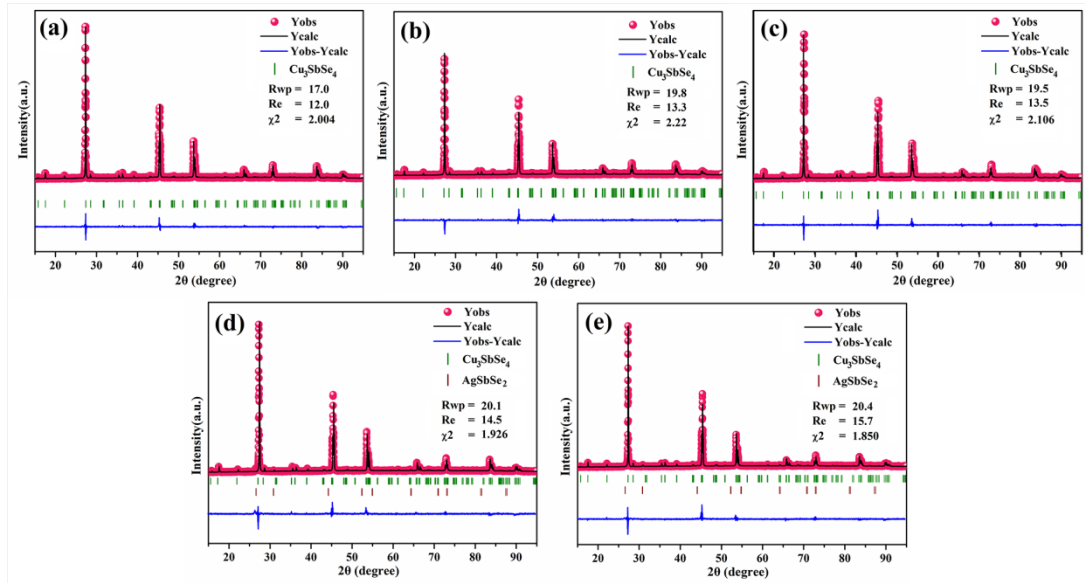

**Fig. S1.** Rietveld refinement using X-ray diffraction data for  $\text{Cu}_{3-3x}\text{Ag}_{3x}\text{SbSe}_4$  samples: (a)  $x = 0.02$ ; (b)  $x = 0.03$ ; (c)  $x = 0.04$ ; (d)  $x = 0.05$ ; (e)  $x = 0.06$ .

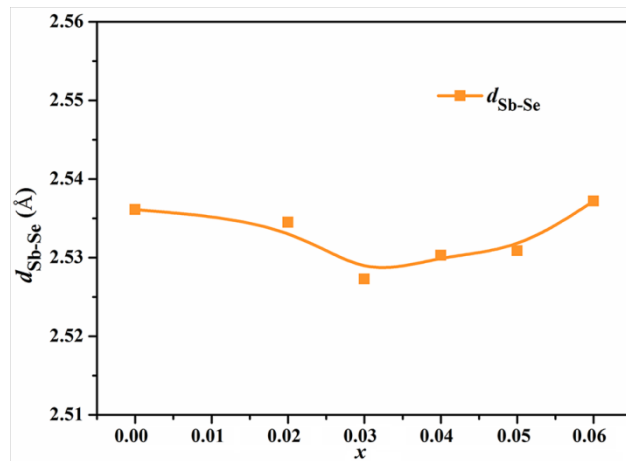

**Fig. S2.** The calculated distance between Sb site and Se site for  $\text{Cu}_{3-3x}\text{Ag}_{3x}\text{SbSe}_4$  ( $x = 0, 0.02, 0.03, 0.04, 0.05, 0.06$ ) samples.

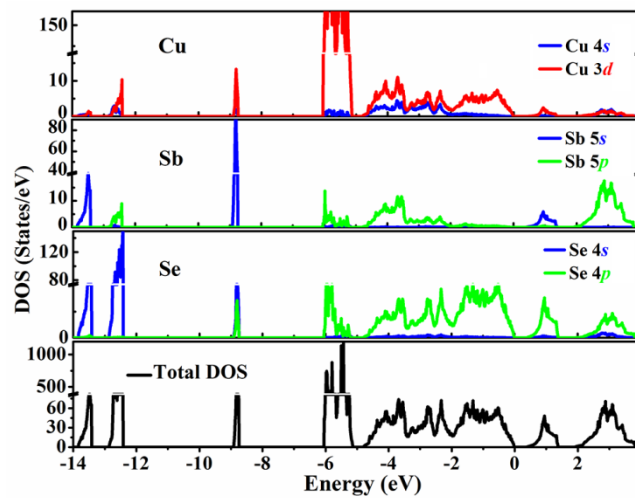

**Fig. S3.** The calculated total and partial density of states (PDOS) for pristine  $\text{Cu}_3\text{SbSe}_4$ .

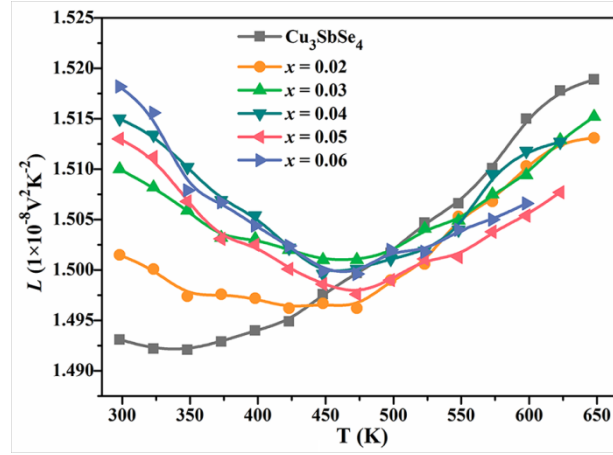

**Fig. S4.** Temperature dependence of the calculated Lorenz number.

**Tab. S1.** The relative content of AgSbSe<sub>2</sub>, calculated carrier effective mass ( $m^*$ ), and measured density for Cu<sub>3-3x</sub>Ag<sub>3x</sub>SbSe<sub>4</sub> samples ( $x= 0, 0.02, 0.03, 0.04, 0.05$  and  $0.06$ ).

| Sample     | AgSbSe <sub>2</sub><br>(wt.%) | $m^*$<br>( $m_e$ ) | Density<br>( $g.cm^{-3}$ ) | Theoretical<br>Density<br>(%) |
|------------|-------------------------------|--------------------|----------------------------|-------------------------------|
| $x = 0.00$ | --                            | 1.40               | 5.60                       | 96.6                          |
| $x = 0.02$ | --                            | 1.46               | 5.55                       | 95.7                          |
| $x = 0.03$ | --                            | 1.80               | 5.67                       | 97.8                          |
| $x = 0.04$ | --                            | 1.60               | 5.56                       | 95.9                          |
| $x = 0.05$ | 0.48                          | 1.41               | 5.61                       | 96.7                          |
| $x = 0.06$ | 1.29                          | 1.21               | 5.58                       | 96.2                          |

**Tab. S2.** Physical parameters (average sound velocity  $v_a$ , Debye temperature  $\theta$ , Poisson ratio  $\varepsilon$ , bulk modulus  $B$  and Grüneisen parameter  $\gamma$ ) calculated from the measured longitudinal ( $v_L$ ) and transverse ( $v_T$ ) sound velocity at room temperature for  $\text{Cu}_{3-3x}\text{Ag}_{3x}\text{SbSe}_4$  samples ( $x = 0, 0.02, 0.03, 0.04, 0.05$  and  $0.06$ )

| Sample     | $v_L$<br>(m/s) | $v_T$<br>(m/s) | $v_a$ (m/s) | $\theta$ (K) | $\varepsilon$ | $B$ (GPa) | $\gamma$ |
|------------|----------------|----------------|-------------|--------------|---------------|-----------|----------|
| $x = 0.00$ | 3976           | 2012           | 2256        | 238          | 0.3           | 62.4      | 1.96     |
| $x = 0.02$ | 3896           | 1963           | 2201        | 232          | 0.3           | 59.4      | 1.97     |
| $x = 0.03$ | 3896           | 1955           | 2193        | 231          | 0.3           | 59.1      | 1.99     |
| $x = 0.04$ | 3899           | 1989           | 2229        | 235          | 0.3           | 60.8      | 1.93     |
| $x = 0.05$ | 3889           | 1964           | 2202        | 232          | 0.3           | 59.5      | 1.97     |
| $x = 0.06$ | 3862           | 1955           | 2192        | 231          | 0.3           | 58.9      | 1.96     |

## References

- [1] G. S. Nolas, J. Sharp and H. J. Goldsmid, *Thermoelectrics: Basic Principles and New Materials Developments*, Springer, Berlin, 2001, 36-42.
- [2] Andrew F. May and G. Jeffrey Snyder, in *Materials, Preparation and Characterization in Thermoelectrics*, ed. D. M. Rowe, CRC press, Boca Raton, 2012, chap. 11, 1-18
- [3] J.Callyway, H. C. Von Baeyer, *Phys. Rev.*, 1960, **120**, 1149;
- [4] T. K.Dey, K. D.Chaudhuri, *J. Low. Temp. Phys.*, 1976, **23**, 419;
- [5] J.Yang, G. P. Meisner, L Chen, *Appl. Phys. Lett.*, 2004, **85**, 1140.
- [6] C. L. Wan, W. Pan, Q. Xu, Y. X. Qin, J. D. Wang, Z. X. Qu and M. H. Fang, *Phys. Rev. B*, 2006, **74**, 144109.
